# Supplementary material for: Survey of Spanish nephrologists' opinion on the applicability of Fried's geriatric frailty criteria in patients with end-stage renal disease.
Source: Research Square preprint supplement (doi:10.21203/rs.3.rs-8011485/v1), 2025-12-01
Supplement: Supplementary file 1 [file ff13c69804dd0307fd0df10d.docx]

**Table S1.** Survey

**Thank you for participating in our survey! Completing this survey and submitting it to us means you consent to participate in this study.**

**Block 1: Introduction**

Q 1: In your clinical practice, do you care for adults with end-stage renal disease (ESRD)?

Q2: What is your age?

Q3: What is your sex?

Q4: How many years have you been practice?

Q5: What is your specialty?

**Block 2: Frailty**

Q6: Do you think adults with ESRD are more likely or less likely to be frail than healthy adults?

Q7: The frailty phenotype is comprised of 5 components and the presence of 3 or more signifies frailty. The 5 components are: unintentional weight loss, slowed walking, low physical activity, weak strength and exhaustion. Are the above listed components relevant to patients with ESRD?

Q8: Are there additional components that characterize frailty in adults with ESRD that you would add to the list?

Q9: Please list the components that you would add.

Q10: Please briefly explain why you would remove unintentional weight loss.

Q11: Please briefly explain why you would remove slowed walking.

Q12: Please briefly explain why you would remove low physical activity.

Q13: Please briefly explain why you would remove weak strength.

Q14: Please briefly explain why you would remove exhaustion.

**Block 3: Asthenia**

Q15: Do you think adults with ESRD are more or less likely to experience asthenia than healthy adults?

Q16: Are there aspects of ESRD that make patients experience asthenia? Please explain your answer.

**Block 4: Interventions**

Q17: Do you think patients with ESRD could preserve cognitive function by playing brain games while undergoing dialysis?

Q18: Why do you think patients could not preserve cognitive function by playing brain games while undergoing dialysis?

Q19: Do you think your patients would be interested in doing brain training exercises while on dialysis?

Q20: On a scale from 1 to 5, mark your opinion on the logistics of having adults with ESRD use tablets during dialysis to do brain training exercises

Q21: Do you think patients with ESRD could improve physical function by using a foot peddler while undergoing dialysis? A foot peddler is like a bike that you could use while seated in the dialysis chair.

Q22: Why do you think patients with ESRD could not improve physical function by using a foot peddler while undergoing dialysis?

Q23: Do you think using a foot peddler would make a person undergoing dialysis less frail?

Q24: Do you think using a foot peddler would make a person undergoing dialysis less fatigued?

Q25: Do you think your patients would be interested in using a foot peddler while on dialysis?

Q26: On a scale from 1 to 5, mark your opinion on the logistics of having adults with ESRD use foot peddlers during dialysis.

**Block 5: Prehabilitation**

Q27: Do you think prehabilitation prior to transplantation could help improve post-operative outcomes in adults with ESRD?

Q28: Why do you think prehabilitation prior to transplantation could not help improve post-operative outcomes in adults with ESRD?

Q29: Do you think prehabilitation could make someone undergoing a kidney transplant less frail?

Q 30: Do you think prehabilitation could make someone undergoing a kidney transplant less fatigued?

Q31: Do you think patients would be interested in prehabilitation before their kidney transplant?

Q 32: On a scale from 1 to 5, mark your opinion on the logistics of having adults with ESRD undergo prehabilitation before their kidney transplant.

Q33: Could you think of any type of intervention that could improve frailty in patients on dialysis or awaiting a transplant?

Q 34: Is there anything else you would like us to know about frailty, asthenia or interventions in adults with ESRD?
